# Supplementary material for: Identification of Transcription Factors and the Regulatory Genes Involved in Triacylglycerol Accumulation in the Unicellular Red Alga Cyanidioschyzon merolae
Source: MDPI journal article supplement (doi:10.3390/plants10050971), 2021-05-13
Supplement: s1 [file s1]

**Table S1** Primers used for construction of overexpression strains.

| Gene             | Primer  | Sequence (5'-3')                           |
|------------------|---------|--------------------------------------------|
| <i>CMT067C</i>   | T067_Fw | TTCTTCGTTTCGTTGACCCCCATGAGCGAATCTGCTGCCGC  |
|                  | T067_Rv | TGCAGGTCGACTCTAGACCCGCTCAGCGAGCGTTCAAAAT   |
| <i>CML246C</i>   | L246_Fw | TTCTTCGTTTCGTTGACCCCCATGGAGGCGACACTGCGGGCG |
|                  | L246_Rv | TGCAGGTCGACTCTAGACCCTAGCATATTCTCCTGTGCAA   |
| <i>CMR124C</i>   | R124_Fw | TTCTTCGTTTCGTTGACCCCCATGGATATTTCTGGCAGTGTC |
|                  | R124_Rv | TGCAGGTCGACTCTAGACCCTGATCTGTCCAGGTCTTCAG   |
| <i>CMT597C</i>   | T597_Fw | TTCTTCGTTTCGTTGACCCCCATGGACTTATTGGCAAAAGC  |
|                  | T597_Rv | TGCAGGTCGACTCTAGACCCCTTGCTGGTAGCGGTACAT    |
| <i>CMR165C</i>   | R165_Fw | TTCTTCGTTTCGTTGACCCCCATGTTACGCAGGGACGTAC   |
|                  | R165_Rv | TGCAGGTCGACTCTAGACCCCAGTGCCTTGTGTTTCAGCG   |
| <i>CML277C</i>   | L277_Fw | TTCTTCGTTTCGTTGACCCCCATGACAGAGAGTGTAACCAA  |
| ( <i>HSF1</i> )  | L277_Rv | TGCAGGTCGACTCTAGACCCGTCTTGCTCTGGTGTATCTT   |
| <i>CMO347C</i>   | O347_Fw | TTCTTCGTTTCGTTGACCCCCATGGTGCAGGACCCGGTAGT  |
| ( <i>MYB4</i> )  | O347_Rv | TGCAGGTCGACTCTAGACCCGGTTGCAGCGAGGAGAGCGG   |
| <i>CMS371C</i>   | S371_Fw | TTCTTCGTTTCGTTGACCCCCATGGGGTCCGAAAAGCATGA  |
|                  | S371_Rv | TGCAGGTCGACTCTAGACCCCGAATAGGGCATGCTCTCTT   |
| <i>CML101C</i>   | L101_Fw | TTCTTCGTTTCGTTGACCCCCATGGACCCAGGCAAGTCCAC  |
| ( <i>MYB3</i> )  | L101_Rv | TGCAGGTCGACTCTAGACCCGGGAAACGGCAGCGACGATG   |
| <i>CMK212C</i>   | K212_Fw | TTCTTCGTTTCGTTGACCCCCATGGAAGACGGGGCACAGGG  |
| ( <i>BRD1</i> )  | K212_Rv | TGCAGGTCGACTCTAGACCCGTATTCGTCCCATCGCTGG    |
| <i>CML282C</i>   | L282_Fw | TTCTTCGTTTCGTTGACCCCCATGGAAGGAGACCTGCACGC  |
|                  | L282_Rv | TGCAGGTCGACTCTAGACCCGAGCACGGACGCAGGCTCCT   |
| <i>CMM055C</i>   | M055_Fw | TTCTTCGTTTCGTTGACCCCCATGAACGCTGCGGTTCTTCG  |
|                  | M055_Rv | TGCAGGTCGACTCTAGACCCCTTTGAGGCGTTTCGCAGCTT  |
| <i>CMB028C</i>   | B028_Fw | TTCTTCGTTTCGTTGACCCCCATGCAGCGTGTGATGGCGC   |
|                  | B028_Rv | TGCAGGTCGACTCTAGACCCAACCTGCGGTCTGAGCATAG   |
| <i>CMR472C</i>   | R472_Fw | TTCTTCGTTTCGTTGACCCCCATGAGCGAAGACTCACGCAC  |
|                  | R472_Rv | TGCAGGTCGACTCTAGACCCTTTGGGGCGAGCTCGCACGT   |
| <i>CMJ021C</i>   | J021_Fw | TTCTTCGTTTCGTTGACCCCCATGATCCGTGATCCATACCGA |
| ( <i>LPAT1</i> ) | J021_Rv | TGCAGGTCGACTCTAGACCCTGATCCGCAGTTTGGATCGCA  |
