# Supplementary material for: Identification of Transcription Factors and the Regulatory Genes Involved in Triacylglycerol Accumulation in the Unicellular Red Alga Cyanidioschyzon merolae
Source: MDPI journal article supplement (doi:10.3390/plants10050971), 2021-05-13
Supplement: s1 [file s1]

Table S3. Sequence read counts of raw data, trimmed data, and mapped data.

| Sample name        | Total read pairs | Number of reads |                        | Number of mapped reads |
|--------------------|------------------|-----------------|------------------------|------------------------|
|                    |                  |                 | after quality trimming |                        |
| TFc                | 16,034,815       | read1           | 14,461,313             | 13,578,559             |
|                    |                  | read2           | 14,547,270             | 13,659,335             |
| BRD1ox (CMK212Cox) | 14,836,994       | read1           | 13,403,136             | 12,713,115             |
|                    |                  | read2           | 13,484,513             | 12,791,752             |
| MYB3ox (CML101Cox) | 15,230,883       | read1           | 13,676,879             | 12,824,716             |
|                    |                  | read2           | 13,774,656             | 12,917,260             |
| HSF1ox (CML277Cox) | 9,868,974        | read1           | 8,846,548              | 8,327,980              |
|                    |                  | read2           | 8,891,290              | 8,370,375              |
| MYB4ox (CMO347Cox) | 13,350,494       | read1           | 11,940,064             | 11,155,619             |
|                    |                  | read2           | 12,000,539             | 11,211,358             |
