# Supplementary material for: Identification of Transcription Factors and the Regulatory Genes Involved in Triacylglycerol Accumulation in the Unicellular Red Alga Cyanidioschyzon merolae
Source: MDPI journal article supplement (doi:10.3390/plants10050971), 2021-05-13
Supplement: s1 [file s1]

**Table S2** Primers used for qRT-PCR analysis.

| Gene           | Primer      | Sequence (5'-3')     |
|----------------|-------------|----------------------|
| <i>CML277C</i> | L277_QRT_F1 | ATTGAGCTCATTCGCAACCT |
| <i>(HSF1)</i>  | L277_QRT_R1 | GAGGTGGAGACCACTGCAAC |
| <i>CMO347C</i> | O347_QRT_F1 | TATCACTCCCACCCGACATT |
| <i>(MYB4)</i>  | O347_QRT_R1 | TCCCTCGCTTTCAAATTGTT |
| <i>CML101C</i> | L101_QRT_F1 | TCTAGAGGAGGCATCGGAGA |
| <i>(MYB3)</i>  | L101_QRT_R1 | CTCCTCGGGTACCATGAAAA |
| <i>CMK212C</i> | K212_QRT_F1 | GTCGAGCTATTCGGTTCTCG |
| <i>(BRD1)</i>  | K212_QRT_R1 | AGTCTCATTGCTGGCCTGTT |
| <i>CMJ021C</i> | J021_QRT_F1 | TTTCTAGGCCGGTTTTTCAA |
| <i>(LPAT1)</i> | J021_QRT_R1 | GTCGACTATCCCGCTCAATC |
